# Supplementary material for: Prognostic microRNA signatures derived from The Cancer Genome Atlas for head and neck squamous cell carcinomas
Source: PubMed Central journal article supplement (PMC4944889; doi:10.1002/cam4.718), 2016-04-25

**Supplementary Table 1.** Multivariate Cox regression analysis to evaluate independence of the prognostic miRNA signatures from clinical parameters.

| Parameter                                            | OPSCC  |                      | OSCC  |                      | LSCC  |                      |
|------------------------------------------------------|--------|----------------------|-------|----------------------|-------|----------------------|
|                                                      | HR     | P-value <sup>a</sup> | HR    | P-value <sup>a</sup> | HR    | P-value <sup>a</sup> |
| miRNA signature                                      | 11.847 | 0.0039               | 1.88  | 1.8E-03              | 2.843 | 1.3E-02              |
| Age                                                  | 1.056  | 0.054                | 1.017 | 6.1E-02              | 0.978 | 0.32                 |
| Sex                                                  | 0.741  | 0.68                 | 1.129 | 0.6                  | 0.455 | 5.6E-02              |
| Stage (I/II/III vs IV)                               | 2.936  | 0.11                 | 2.155 | 6.3E-04              | 1.013 | 0.91                 |
| Tobacco                                              | 1.386  | 0.31                 | 1.052 | 0.54                 | 1.17  | 0.40                 |
| Treatment (chemotherapy vs radiotherapy vs combined) | 0.637  | 0.034                | 0.906 | 0.96                 | 0.866 | 0.17                 |
| Race (White vs. other)                               | 7.906  | 0.11                 | 0.919 | 0.95                 | 2.369 | 2.6E-02              |

<sup>a</sup> P-values were calculated using the Wald test.

**Supplementary Table 2.** Characteristics of the OPSCC patients at Washington University.

|                                                       | OPSCC miRNA validation cohort (n=66) | OPSCC mRNA gene validation cohort (n=39) |
|-------------------------------------------------------|--------------------------------------|------------------------------------------|
| <b>Age at diagnosis (mean <math>\pm</math> SD, y)</b> | 58.5 $\pm$ 10.2                      | 55.8 $\pm$ 10.3                          |
| <b>Sex</b>                                            |                                      |                                          |
| Male                                                  | 54 (81.8%)                           | 36 (92.3%)                               |
| Female                                                | 12 (18.2%)                           | 3 (7.7%)                                 |
| <b>Race</b>                                           |                                      |                                          |
| White                                                 | 65 (98.5%)                           | 36 (92.3%)                               |
| Other                                                 | 1 (1.5%)                             | 3 (7.7%)                                 |
| <b>Smoking</b>                                        |                                      |                                          |
| Unreported                                            | 1 (1.5%)                             | 4 (10.3%)                                |
| Non-smoker                                            | 22 (33.3%)                           | 12 (30.8%)                               |
| Former smoker                                         | 27 (40.9%)                           | 20 (51.3%)                               |
| Current smoker                                        | 16 (24.2%)                           | 3 (7.7%)                                 |
| <b>T Classification</b>                               |                                      |                                          |
| Tx                                                    | 6 (9.1%)                             | 6 (15.4%)                                |
| T1                                                    | 28 (42.4%)                           | 14 (34.9%)                               |
| T2                                                    | 15 (22.7%)                           | 9 (23.1%)                                |
| T3                                                    | 7 (10.6%)                            | 4 (10.3%)                                |
| T4                                                    | 10 (15.2%)                           | 6 (15.4%)                                |
| <b>N Classification</b>                               |                                      |                                          |
| NX                                                    | 0 (0.0%)                             | 6 (15.4%)                                |
| N0                                                    | 12 (18.2%)                           | 2 (5.1%)                                 |
| N1                                                    | 13 (19.7%)                           | 4 (10.2%)                                |
| N2                                                    | 37 (56.1%)                           | 24 (61.5%)                               |
| N3                                                    | 4 (6.1%)                             | 3 (7.7%)                                 |
| <b>Stage</b>                                          |                                      |                                          |
| Unreported                                            | 0 (0.0%)                             | 6 (15.4%)                                |
| I                                                     | 4 (6.1%)                             | 1 (2.6%)                                 |
| II                                                    | 5 (7.6%)                             | 0 (0.0%)                                 |
| III                                                   | 15 (22.7%)                           | 5 (12.8%)                                |
| IV                                                    | 42 (63.6%)                           | 27 (69.2%)                               |
| <b>Deceased</b>                                       | 10 (15.2%)                           | 14 (35.9%)                               |

**Supplementary Table 3.** Genes identified as significantly dysregulated between living and deceased patients by combined SVM-RFE and Cox regression analysis.

| Gene ID   | Gene abbreviation | p-value <sup>a</sup> | Fold change <sup>b</sup> | Wald coefficient <sup>c</sup> |
|-----------|-------------------|----------------------|--------------------------|-------------------------------|
| 490       | ATP2B1            | 4.0E-03              | -0.611                   | -6.15                         |
| 926       | CD8B              | 4.9E-04              | -1.513                   | -5.00                         |
| 1386      | ATF2              | 7.4E-04              | -0.405                   | -9.90                         |
| 3963      | LGALS7            | 5.5E-03              | 0.480                    | 6.34                          |
| 4103      | MAGEA4            | 9.2E-03              | 2.685                    | 8.40                          |
| 4322      | MMP13             | 9.3E-04              | 2.862                    | 12.83                         |
| 5412      | UBL3              | 3.5E-05              | -0.437                   | -10.67                        |
| 8829      | NRP1              | 3.5E-03              | -0.223                   | 8.46                          |
| 10362     | HMG20B            | 3.1E-03              | -0.416                   | -6.85                         |
| 10868     | USP20             | 3.6E-05              | -0.475                   | -10.43                        |
| 11044     | PAPD7             | 2.4E-04              | -0.527                   | -11.21                        |
| 22887     | FOXJ3             | 4.2E-05              | -0.367                   | -14.87                        |
| 23530     | NNT               | 1.3E-04              | -0.661                   | -11.88                        |
| 51104     | ABHD17B           | 4.3E-06              | -0.631                   | -15.28                        |
| 51350     | KRT76             | 5.6E-03              | 0.961                    | 11.51                         |
| 55450     | CAMK2N1           | 1.2E-03              | 1.171                    | 12.63                         |
| 56267     | CCBL2             | 1.2E-04              | -0.770                   | -11.73                        |
| 64062     | RBM26             | 2.6E-04              | -0.452                   | -9.79                         |
| 64766     | S100PBP           | 1.5E-05              | -0.393                   | -13.69                        |
| 64781     | CERK              | 6.0E-04              | -0.462                   | -11.42                        |
| 101928783 | LOC10192783       | 6.0E-03              | 0.743                    | 7.04                          |

<sup>a</sup> The p-values were calculated using the logrank test in univariate Cox proportional hazards analysis.

<sup>b</sup> Fold change values were log<sub>2</sub> transformed, representing the average expression difference of the miRNAs in the 2 patient groups (deceased vs alive).

<sup>c</sup> The Wald coefficient was obtained from the Wald test in univariate Cox proportional hazards analysis.

**Supplementary Table 4.** Correlation of the identified OPSCC genes with prognostic miRNA biomarkers.

|           |             | miR-92a     | miR193b | miR-455 | miR-497      |
|-----------|-------------|-------------|---------|---------|--------------|
| 4103      | MAGEA4      | -0.32       | 0.33    | 0.19    | -0.09        |
| 56267     | CCBL2       | -0.08       | -0.24   | -0.21   | 0.07         |
| 51104     | ABHD17B     | -0.16       | -0.19   | -0.15   | -0.12        |
| 64766     | S100PBP     | 0.02        | -0.26   | -0.13   | 0.09         |
| 10868     | USP20       | -0.01       | -0.22   | -0.17   | 0.13         |
| 22887     | FOXJ3       | -0.03       | -0.11   | -0.10   | -0.05        |
| 64062     | RBM26       | 0.22        | -0.22   | -0.09   | 0.04         |
| 490       | ATP2B1      | -0.06       | -0.01   | -0.18   | -0.09        |
| 8829      | NRP1        | -0.44       | 0.08    | 0.04    | -0.12        |
| 3963      | LGALS7      | -0.33       | 0.19    | 0.28    | -0.17        |
| 101928783 | LOC10192783 | -0.18       | 0.13    | 0.11    | -0.24        |
| 4322      | MMP13       | -0.45       | 0.17    | 0.21    | -0.14        |
| 1386      | ATF2        | -0.04       | 0.05    | -0.04   | -0.15        |
| 23530     | NNT         | -0.03       | -0.22   | -0.10   | -0.05        |
| 10362     | HMG20B      | -0.21       | -0.07   | 0.00    | 0.01         |
| 5412      | UBL3        | -0.16       | -0.19   | -0.23   | <u>-0.05</u> |
| 55450     | CAMK2N1     | -0.40       | 0.34    | 0.31    | -0.15        |
| 51350     | KRT76       | -0.37       | 0.25    | 0.27    | -0.22        |
| 11044     | PAPD7       | <u>0.02</u> | -0.08   | 0.00    | -0.04        |
| 926       | CD8B        | 0.07        | 0.01    | 0.06    | 0.14         |
| 64781     | CERK        | -0.11       | -0.18   | -0.15   | -0.01        |

The numbers represent correlation coefficients between individual miRNAs and mRNA genes. The underlined scores indicate that the gene is identified as a target of the associated miRNA based on miRDB prediction.

**Supplementary Table 5.** Significantly dysregulated miRNAs associated with overall survival and used to develop prognostic models for OSCC and LSCC, respectively.

|             | <b>miRNA name</b> | <b>Fold change<sup>a</sup></b> | <b>p-value<sup>b</sup></b> |
|-------------|-------------------|--------------------------------|----------------------------|
| <b>OSCC</b> | hsa-miR-337-3p    | 0.220                          | 8.6E-04                    |
|             | hsa-miR-369-5p    | 0.428                          | 5.5E-03                    |
|             | hsa-miR-218-5p    | 0.197                          | 1.4E-02                    |
|             | hsa-miR-127-5p    | 0.381                          | 7.0E-03                    |
| <b>LSCC</b> | hsa-let-7a-3p     | -0.710                         | 5.2E-04                    |
|             | hsa-miR-145-5p    | -0.440                         | 6.2E-03                    |
|             | hsa-miR-129-5p    | 1.349                          | 3.8E-02                    |
|             | hsa-miR-26b-5p    | -0.333                         | 8.4E-03                    |

## **Supplementary Methods**

### *RNA sequencing for mRNA gene model validation*

RNA sequencing (RNA-seq) was utilized to profile the expression of the identified mRNA biomarkers from TCGA analysis. Details of the experimental protocol have been described previously <sup>1</sup>. Briefly, total RNA was used to construct cDNA libraries which were then provided to the Genome Technology Access Center at Washington University School of Medicine for sequencing with Illumina HiSeq 2500. The sequence reads were preprocessed to remove low-quality reads before being aligned to the human transcriptome and virome, as described previously.

## **Supplementary Results**

### *Identification of an mRNA-based prognostic signature for overall survival in OPSCC*

Of the 82 identified OPSCC patients, 72 had raw RNA-seq data available. This dataset was analyzed to determine which genes were significantly over- or under-expressed when associated with overall survival. In this way, we identified 21 genes that showed significant correlation to survival based on univariate Cox analysis (Supplementary Table 3). These genes were also identified as having high relative independent prognostic values through RFE, as described earlier.

To confirm that these genes were not associated with the miRNA signature, we performed correlation analysis against the four miRNAs included in the prognostic signature. These genes showed little negative correlation to the four prognostic miRNAs, suggesting that the genes were not directly regulated by the miRNAs (Supplementary Table 4). We also confirmed the lack of regulatory relationship between the miRNAs and mRNAs by target prediction analysis through miRDB <sup>2</sup>(data not shown).

Similar to the miRNA signature, an mRNA prognostic signature for OPSCC was developed using these 21 genes. The coefficients of the model were determined using the Wald scores from the univariate Cox analysis. As described earlier, the patients were stratified into high-risk and low-risk groups by the median score, and the two cohorts showed significantly different likelihood of survival ( $p = 1.1E-06$ ) (Supplementary Figure 4A). This indicates that within the training set obtained from TCGA, this mRNA signature was predictive of survival outcome.

#### *Evaluation of the mRNA-based signature with an independent dataset*

The mRNA signature was evaluated in an independent HPV-positive OPSCC cohort obtained from Washington University School of Medicine. The clinical characteristics of these patients are outlined in Supplementary Table 2. Within this 39 patient cohort, 14 were deceased by the end of five years after treatment. The mRNA signature was evaluated with this cohort through RNA-seq expression analysis. The patients were stratified by median risk score, resulting in 19 patients classified into the high-risk population and 20 into the low-risk population. The mRNA signature was not validated with this independent cohort, as the patients stratified by the signature had very similar outcomes in overall survival ( $p=0.77$ ) (Supplementary Figure 4B).

### **Supplementary Discussion**

Besides the miRNA-seq profiling data, we have also analyzed the RNA-seq data from TCGA to develop an mRNA-based gene signature for OPSCC prognosis. However, this signature was not validated with independent data. This possibly reflected more expression variations for mRNAs in comparison to miRNAs, or may be the result of a smaller sample size, which led to decreased statistical power. Although the mRNA signature was not validated, the mRNA expression data obtained for OPSCC still provided valuable information for functional analysis. Upon conducting gene set enrichment analysis<sup>3</sup>, we found that within the deceased patient

group, the genes associated with epithelial-mesenchymal transition were significantly upregulated (data not shown). This particular cell function has been characterized as crucial in tumor progression [reviewed in <sup>4,5</sup>] and may provide insights into which additional genomic features are involved in the progression of OPSCC. Improved understanding of these mechanisms may lead to further advances in patient prognosis and treatment.

### Supplementary References

1. Jiang Z, Liu W, Wang Y, Gao Z, Gao G, Wang X. Rational design of microRNA-siRNA chimeras for multifunctional target suppression. *RNA*. 2013;19:1745-1754.
2. Wong N, Wang X. miRDB: an online resource for microRNA target prediction and functional annotations. *Nucleic Acids Res*. 2015;43:D146-D152.
3. Subramanian A, Tamayo P, Mootha VK, et al. Gene set enrichment analysis: A knowledge-based approach for interpreting genome-wide expression profiles. *Proc Natl Acad Sci U S A*. 2005;102:15545-15550.
4. Thiery JP. Epithelial-mesenchymal transitions in tumour progression. *Nat Rev Cancer*. 2002;2:442-454.
5. Kalluri R, Weinberg RA. The basics of epithelial-mesenchymal transition. *J Clin Invest*. 2009;119:1420-1428.



## Supplementary Figure Legends

**Supplementary Figure 1.** Receiver operating characteristic (ROC) curves for the training cohort from TCGA and the validation cohort consisting of HPV-positive cases from Washington University.

**Supplementary Figure 2.** Kaplan-Meier survival analysis to evaluate the miRNA prognostic signatures in other subtypes of HNSCC. Survival analysis of the OPSCC miRNA signature in OSCC **(A)** and LSCC **(B)**; survival analysis of the OSCC miRNA signature in OPSCC **(C)** and LSCC **(D)**; survival analysis of the LSCC miRNA signature in OSCC **(E)** and LSCC **(F)**.

**Supplementary Figure 3.** Kaplan-Meier survival analysis to evaluate an existing OPSCC miRNA signature in OSCC **(A)** and LSCC **(B)**.

**Supplementary Figure 4.** Kaplan-Meier survival analysis to evaluate the mRNA prognostic signature for overall survival in the training cohort **(A)** and the validation cohort **(B)**.

# Supplementary Figure 1

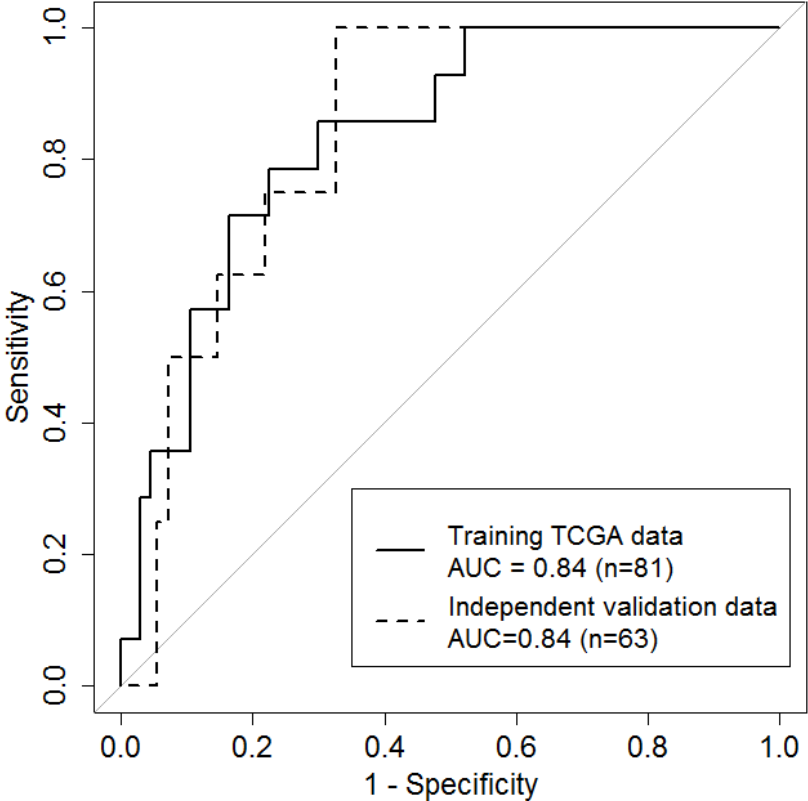

# Supplementary Figure 2

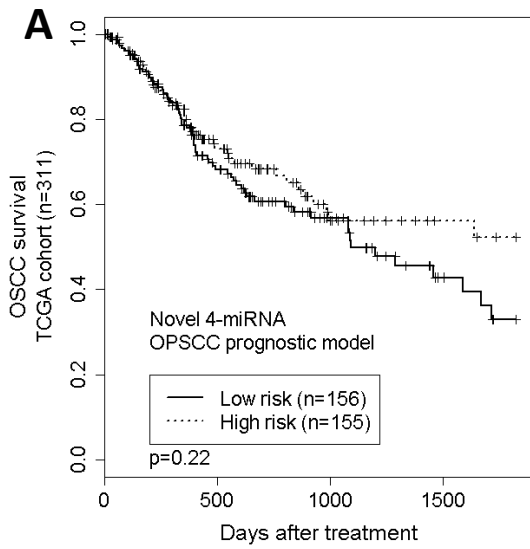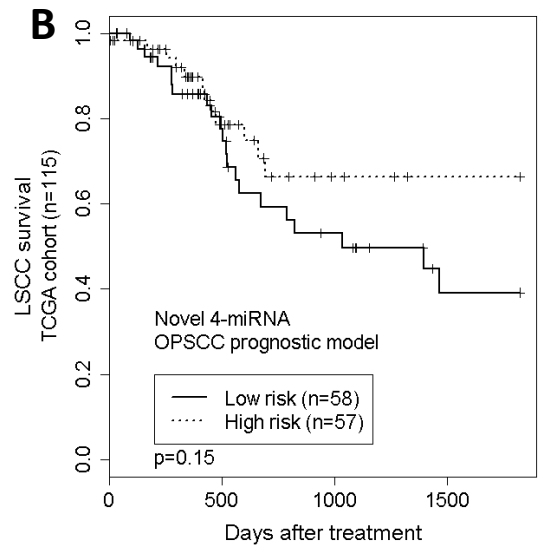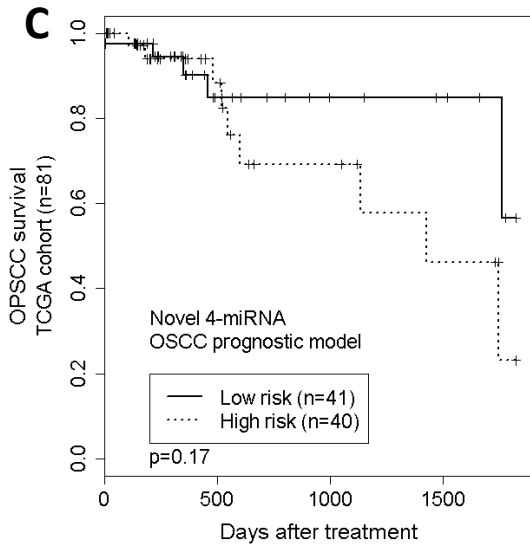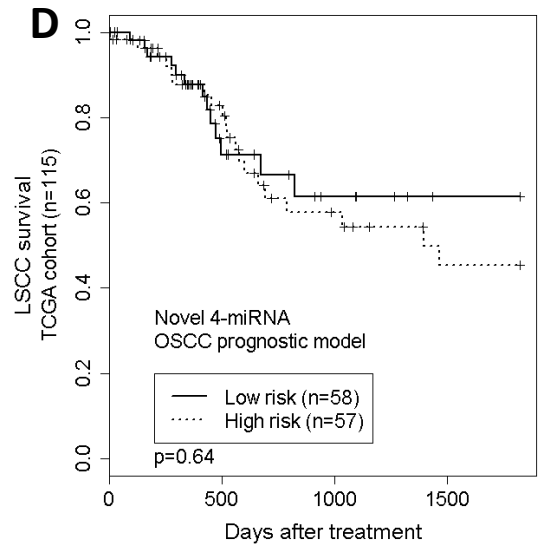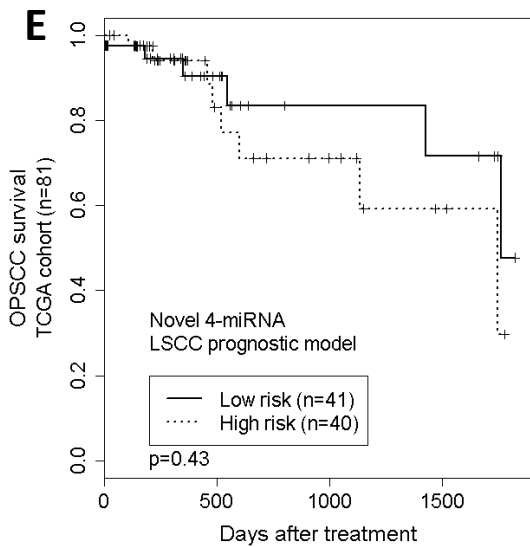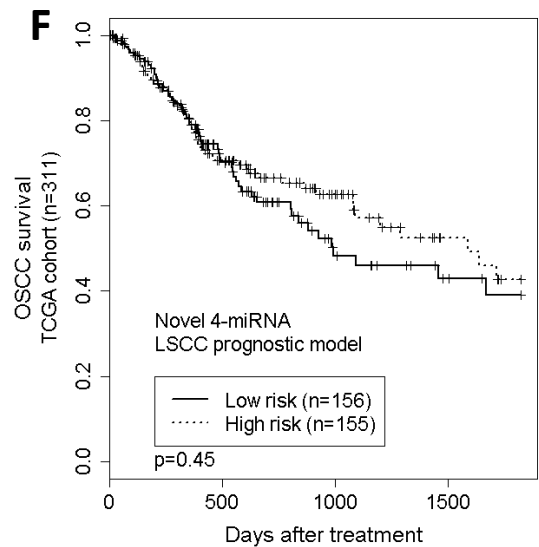

# Supplementary Figure 3

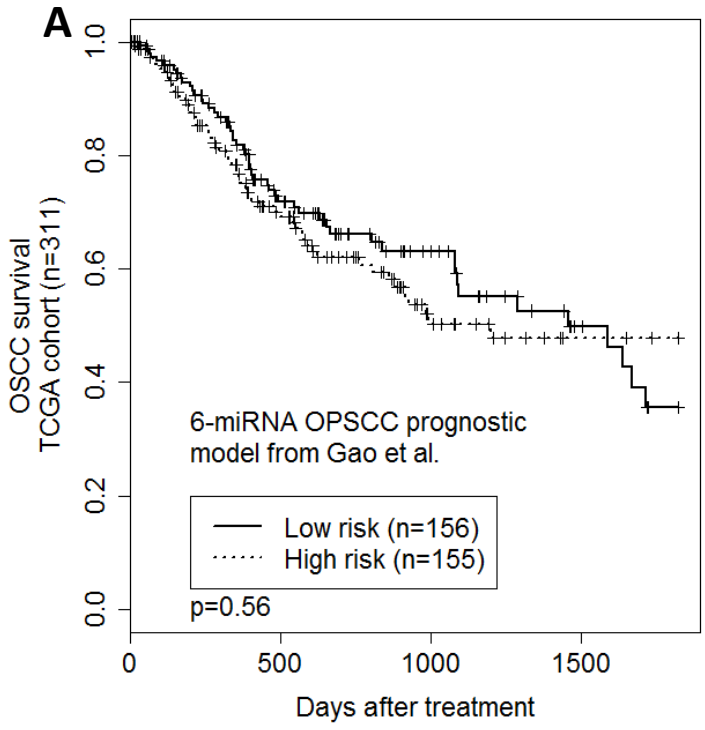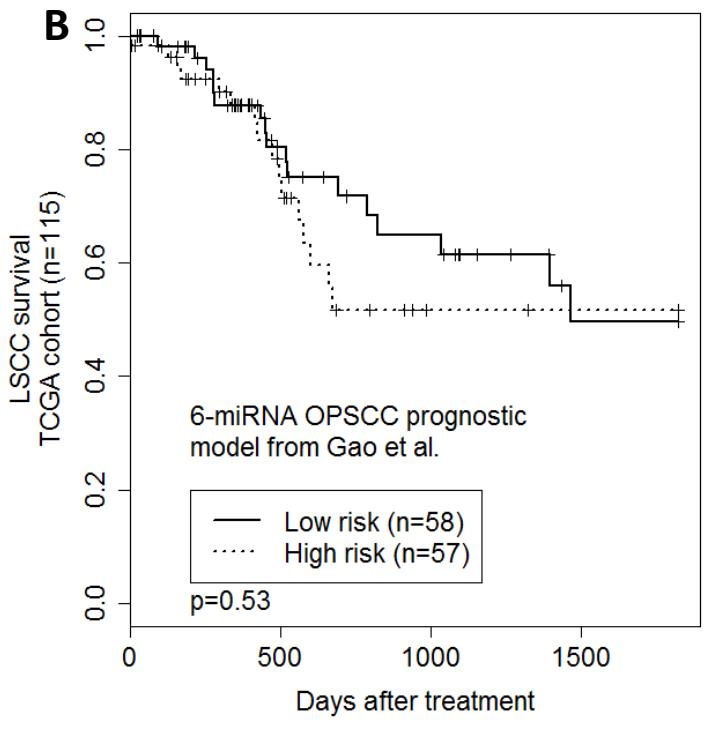

# Supplementary Figure 4

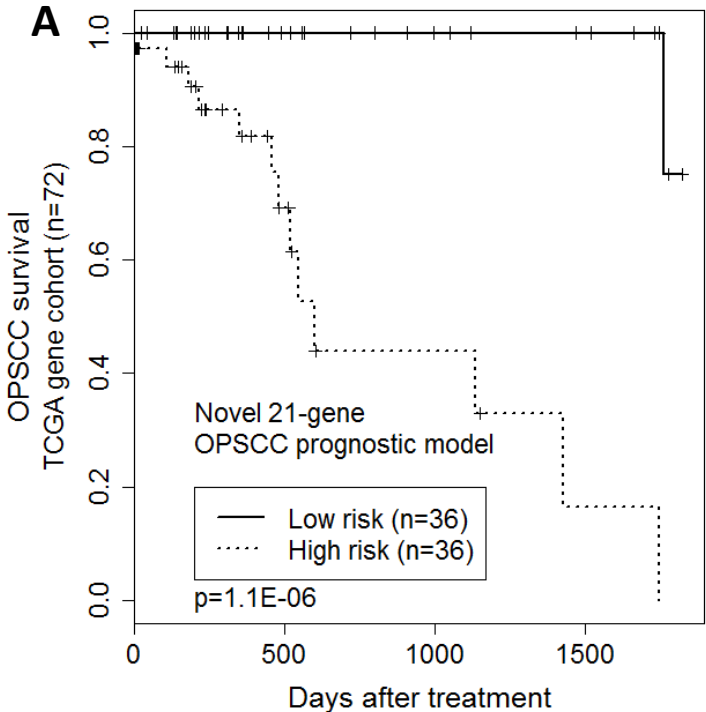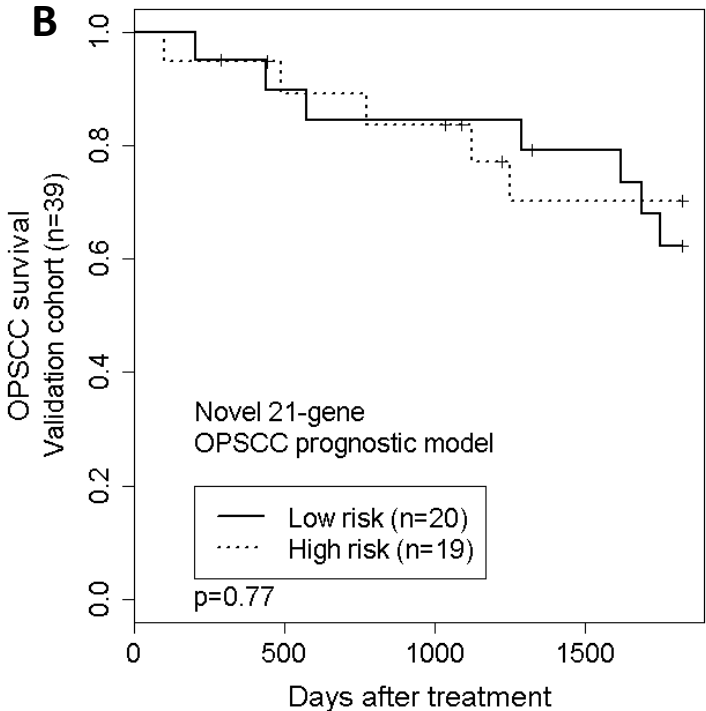

Supplement: CAM4-5-1619-s001.pdf [file CAM4-5-1619-s001.pdf]
